# Supplementary figures and images for: Effect of Chitosan-Diosgenin Combination on Wound Healing
Source: MDPI journal article supplement (doi:10.3390/ijms24055049), 2023-03-06

## Supplementary Materials

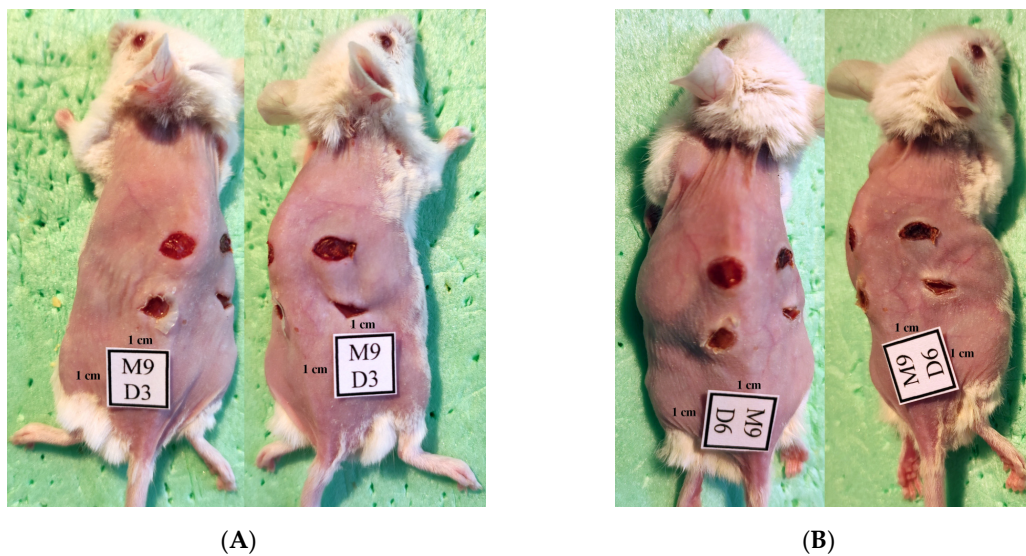

**Figure S1.** Digital imaging of the wound areas after D3 (A) and D6 (B) treatment.

Supplement: s1 [file s1]
